# Supplementary material
Source: PubMed Central journal article supplement (PMC8257558)
Supplement: heartjnl-2020-317756supp001.pdf [file heartjnl-2020-317756supp001.pdf]

**Supplementary Table 1: Reproducibility Analysis for Atrial and Ventricular Function Indices**

|                     | <b>Intraobserver ICC (95%CI)</b> | <b>Mean absolute diff</b> | <b>Interobserver ICC (95%CI)</b> | <b>Mean absolute diff</b> | <b>Test retest ICC (95%CI)</b> | <b>Mean absolute diff</b> |
|---------------------|----------------------------------|---------------------------|----------------------------------|---------------------------|--------------------------------|---------------------------|
| RA reservoir strain | 0.90 (0.86-0.94)                 | 3.1±2.3                   | 0.78 (0.74-0.92)                 | 3.8±2.9                   | 0.86 (0.81-0.91)               | 3.4±2.1                   |
| RA booster strain   | 0.91 (0.86-0.95)                 | 2.8±2.1                   | 0.79 (0.75-0.93)                 | 3.6±2.7                   | 0.85 (0.80-0.90)               | 3.0±2.2                   |
| RA volume index     | 0.84 (0.80-0.88)                 | 4.1±3.4                   | 0.73 (0.70-0.77)                 | 4.4±2.9                   | 0.79 (0.73-0.84)               | 3.8±2.5                   |
| LA reservoir strain | 0.92 (0.90-0.94)                 | 2.4±1.7                   | 0.84 (0.81-0.87)                 | 4.2±2.9                   | 0.88 (0.83-0.92)               | 3.2±2.6                   |
| LA booster strain   | 0.91 (0.88-0.94)                 | 2.1±2.0                   | 0.82 (0.78-0.86)                 | 3.1±3.4                   | 0.87 (0.83-0.91)               | 2.8±3.1                   |
| LA volume index     | 0.89 (0.86-0.92)                 | 2.9±2.6                   | 0.80 (0.77-0.84)                 | 3.8±2.7                   | 0.82 (0.78-0.96)               | 3.4±2.2                   |
| RV GLS              | 0.86 (0.80-0.92)                 | 1.1±1.3                   | 0.81 (0.74-0.89)                 | 1.9±2.2                   | 0.83 (0.78-0.90)               | 1.4±1.5                   |
| LV GLS              | 0.91 (0.87-0.95)                 | 0.9±0.6                   | 0.85 (0.81-0.91)                 | 1.1±1.3                   | 0.87 (0.82-0.92)               | 1.0±1.1                   |

RA: Right atrium; RV: Right ventricle; LA: Left atrium; LV: Left ventricle; GLS: Global longitudinal strain; CI: Confidence interval; ICC: intraclass correlation coefficients; diff: difference

**Supplementary Table 2: Determinants of postoperative improvement in aerobic capacity**

|                                                  | Univariate analysis |        |
|--------------------------------------------------|---------------------|--------|
|                                                  | OR (95% CI)         | p      |
| Age, years                                       | 0.95 (0.92-0.98)    | 0.001  |
| Male                                             | 1.13 (0.65-1.68)    | 0.8    |
| Body mass index, kg/m <sup>2</sup>               | 0.93 (0.72-1.44)    | 0.3    |
| Tricuspid valve repair vs TVR                    | 1.43 (0.94-1.85)    | 0.09   |
| Residual Trivial vs ≥mild TR severity            | 0.92 (0.80-1.13)    | 0.7    |
| History of atrial arrhythmia                     | 1.02 (0.85-1.226)   | 0.4    |
| RA Maze vs no RA Maze                            | 0.98 (0.64-1.37)    | 0.8    |
| Beta blockers                                    | 1.04 (0.83-1.22)    | 0.6    |
| Carpentier Type B                                | 0.89 (0.55-1.33)    | 0.3    |
| Carpentier Type C                                | 0.94 (0.71-1.45)    | 0.6    |
| <b>Baseline echo indices</b>                     |                     |        |
| RA reservoir strain, %                           | 1.09 (1.04-1.15)    | <0.001 |
| RA volume index, ml/m <sup>2</sup>               | 0.98 (0.97-0.99)    | 0.03   |
| RA reservoir strain/RA max volume                | 1.14 (1.08-1.21)    | <0.001 |
| RV global longitudinal strain, %                 | 1.21 (1.03-1.44)    | 0.01   |
| IVC collapsibility, %                            | 1.15 (0.97-1.53)    | 0.2    |
| Estimated RA pressure, mmHg                      | 0.93 (0.87-0.99)    | 0.03   |
| TR velocity, m/s                                 | 0.96 (0.89-1.02)    | 0.2    |
| LA reservoir strain, %                           | 1.13 (1.01-1.28)    | 0.03   |
| LA volume index, ml/m <sup>2</sup>               | 0.96 (0.88-1.02)    | 0.2    |
| LA reservoir strain/LA max volume                | 1.10 (1.02-1.18)    | 0.007  |
| LV end-diastolic volume index, ml/m <sup>2</sup> | 1.05 (1.01-1.09)    | 0.01   |
| LV end-systolic volume index, ml/m <sup>2</sup>  | 1.01 (0.94-1.08)    | 0.4    |
| LV stroke volume index, ml/m <sup>2</sup>        | 1.09 (1.03-1.14)    | 0.002  |
| LV ejection fraction, %                          | 0.98 (0.91-1.05)    | 0.3    |
| LV global longitudinal strain, %                 | 1.02 (0.97-1.08)    | 0.3    |
| Diastolic LV eccentricity index                  | 0.95 (0.91-0.99)    | 0.02   |
| Lateral mitral E/e'                              | 0.97 (0.94-1.02)    | 0.1    |
| <b>Baseline exercise indices</b>                 |                     |        |
| Peak VO <sub>2</sub>                             | 1.11 (1.02-1.27)    | 0.02   |
| Oxygen pulse                                     | 1.13 (1.09-1.18)    | <0.001 |

RA: Right atrium; RV: Right ventricle; IVC: Inferior vena cava; TR: Tricuspid regurgitation; TVR: Tricuspid valve replacement; LA: Left atrium; LV: Left ventricle; E/e': ratio of mitral inflow pulsed wave Doppler early velocity to mitral annular tissue Doppler early velocity; OR: odds ratio; CI: Confidence interval; VO<sub>2</sub>: Oxygen consumption

Note the tricuspid valve anatomic classification was modeled as categorical variables using Carpentier Type A as the reference group.
